# Supplementary figures and images for: Layered double hydroxides intercalated with borate: effect of fertilization on boron leaching and successive sunflower cultivations
Source: Royal Society of Chemistry journal article supplement (doi:10.1039/c9nj04952e), 2019-11-21

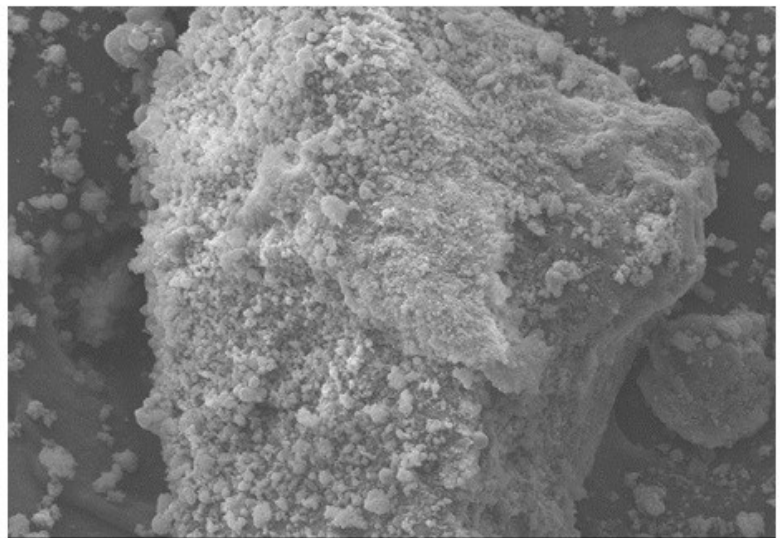

10 μm

EHT = 20.00 kV Mag = 1.00 K X

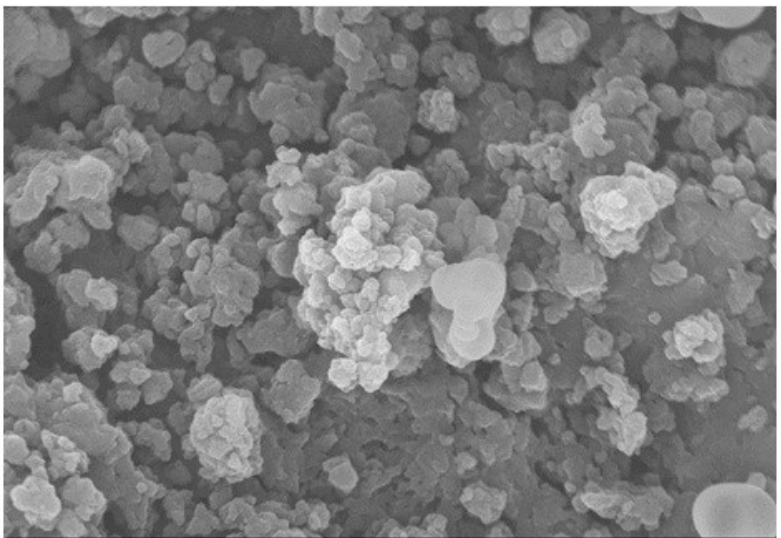

1 μm

EHT = 20.00 kV Mag = 10.00 K X

Supplement: c9nj04952e4.pdf [file c9nj04952e4.pdf]
